# Supplementary material
Source: Research Square preprint supplement (doi:10.21203/rs.3.rs-8871138/v1)
Supplement: Supplementary file 1 [file 3a2ed065313a970975bf280f.pdf]

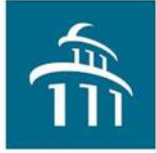

SEGi  
University

SEGi Research Ethics Committee

Ethics Approval Letter

**Ethics Approval Number:** SEGiEC/SR/FOELPM/163/2025-2027

**Date:** 27/6/2025

To,

Zhang Pengfei

FOELPM

**Dear Zhang Pengfei,**

The SEGi Research Ethics Committee reviewed your application on 24/6/2025 to conduct the research project titled “Mapping the Mind in Motion: A Multi-Method GIS–SEM–NCA Model of Green Exposure and Psychological Restoration in Urban Jogging Environments”. Approval is granted for a period of 24 months from June 2025 to June 2027.

The approval has been granted based on reviews by the Committee on the following core principles:

|                                                                                          |                                     |
|------------------------------------------------------------------------------------------|-------------------------------------|
| • Appropriate procedures to protect confidentiality and anonymity of participants        | <input checked="" type="checkbox"/> |
| • Appropriate method of securing data and information collected                          | <input checked="" type="checkbox"/> |
| • Appropriate and sufficient information to obtain informed consent of participants      | <input type="checkbox"/> NA         |
| • No indication of inducements for participation or penalty for not taking part          | <input type="checkbox"/> NA         |
| • Appropriate procedures to prevent or minimise potential risk/ harms to participants    | <input type="checkbox"/> NA         |
| • Appropriate procedures to allow participants to withdraw from the research at any time | <input type="checkbox"/> NA         |
| • Benefits of the research outweigh the risk of harm                                     | <input type="checkbox"/> NA         |
| • Declaration of any actual or potential conflicts of interest                           | <input type="checkbox"/> NA         |

The SREC wishes you every success in your research.

Professor Dr. Priyadarshini HR

Chairperson,

SEGi Research Ethics Committee

The REC members present at the meeting:

|    | <b>Member</b>                                       | <b>Name</b>                  |
|----|-----------------------------------------------------|------------------------------|
| 1. | Cluster Rep from Healthcare & Life Sciences cluster | A/P Dr.Saravana Sampathkumar |
| 2. | Cluster Rep from Engineering & Technology           | Dr. Nurulazlina              |
| 3  | Rep Social Sciences & Humanities                    | Prof Dr.Geetha Subramaniam   |
| 4  | Pharmacist                                          | Ms.Rini Dinesh Sanggaran     |
| 5. | Philosopher/Ethicist                                | Dr.Elise Monerasinghe        |

*Please quote Project Title and Ethical Approval Number in all correspondence to RIMC*
